# Supplementary material for: Biofilm Formation and Detachment in Gram-Negative Pathogens Is Modulated by Select Bile Acids
Source: PubMed Central journal article supplement (PMC4798295; doi:10.1371/journal.pone.0149603), 2016-03-18

**Figure S1.** NMR Spectra for Isolated and Commercial Samples of Taurocholic Acid (**1**), pyridine-d<sub>5</sub>, 600 MHz.

<sup>1</sup>H NMR spectra of TCA (**1**) isolated from extract *R. erythropolis* FI1021DH2S2

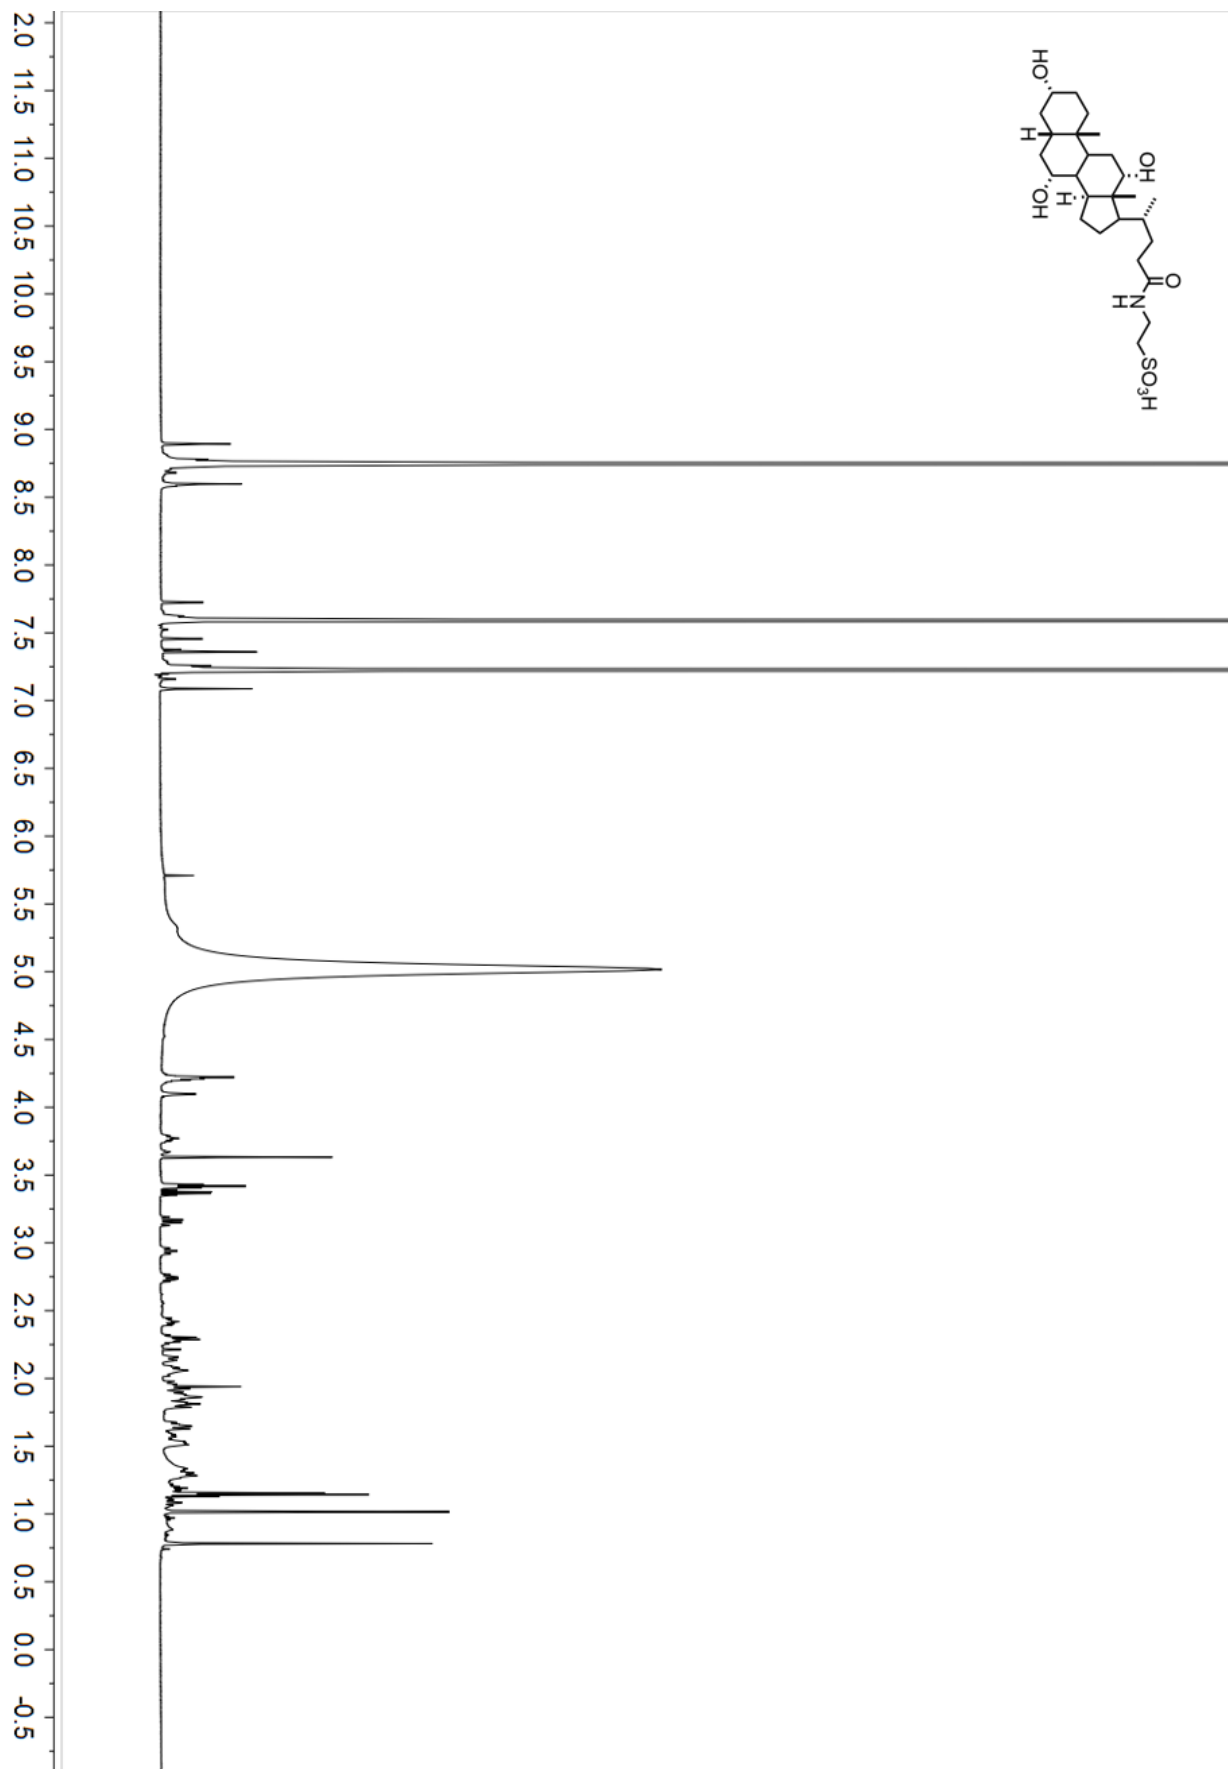

<sup>13</sup>C NMR spectra of TCA (1) isolated from extract *R. erythropolis* FI1021DH2S2

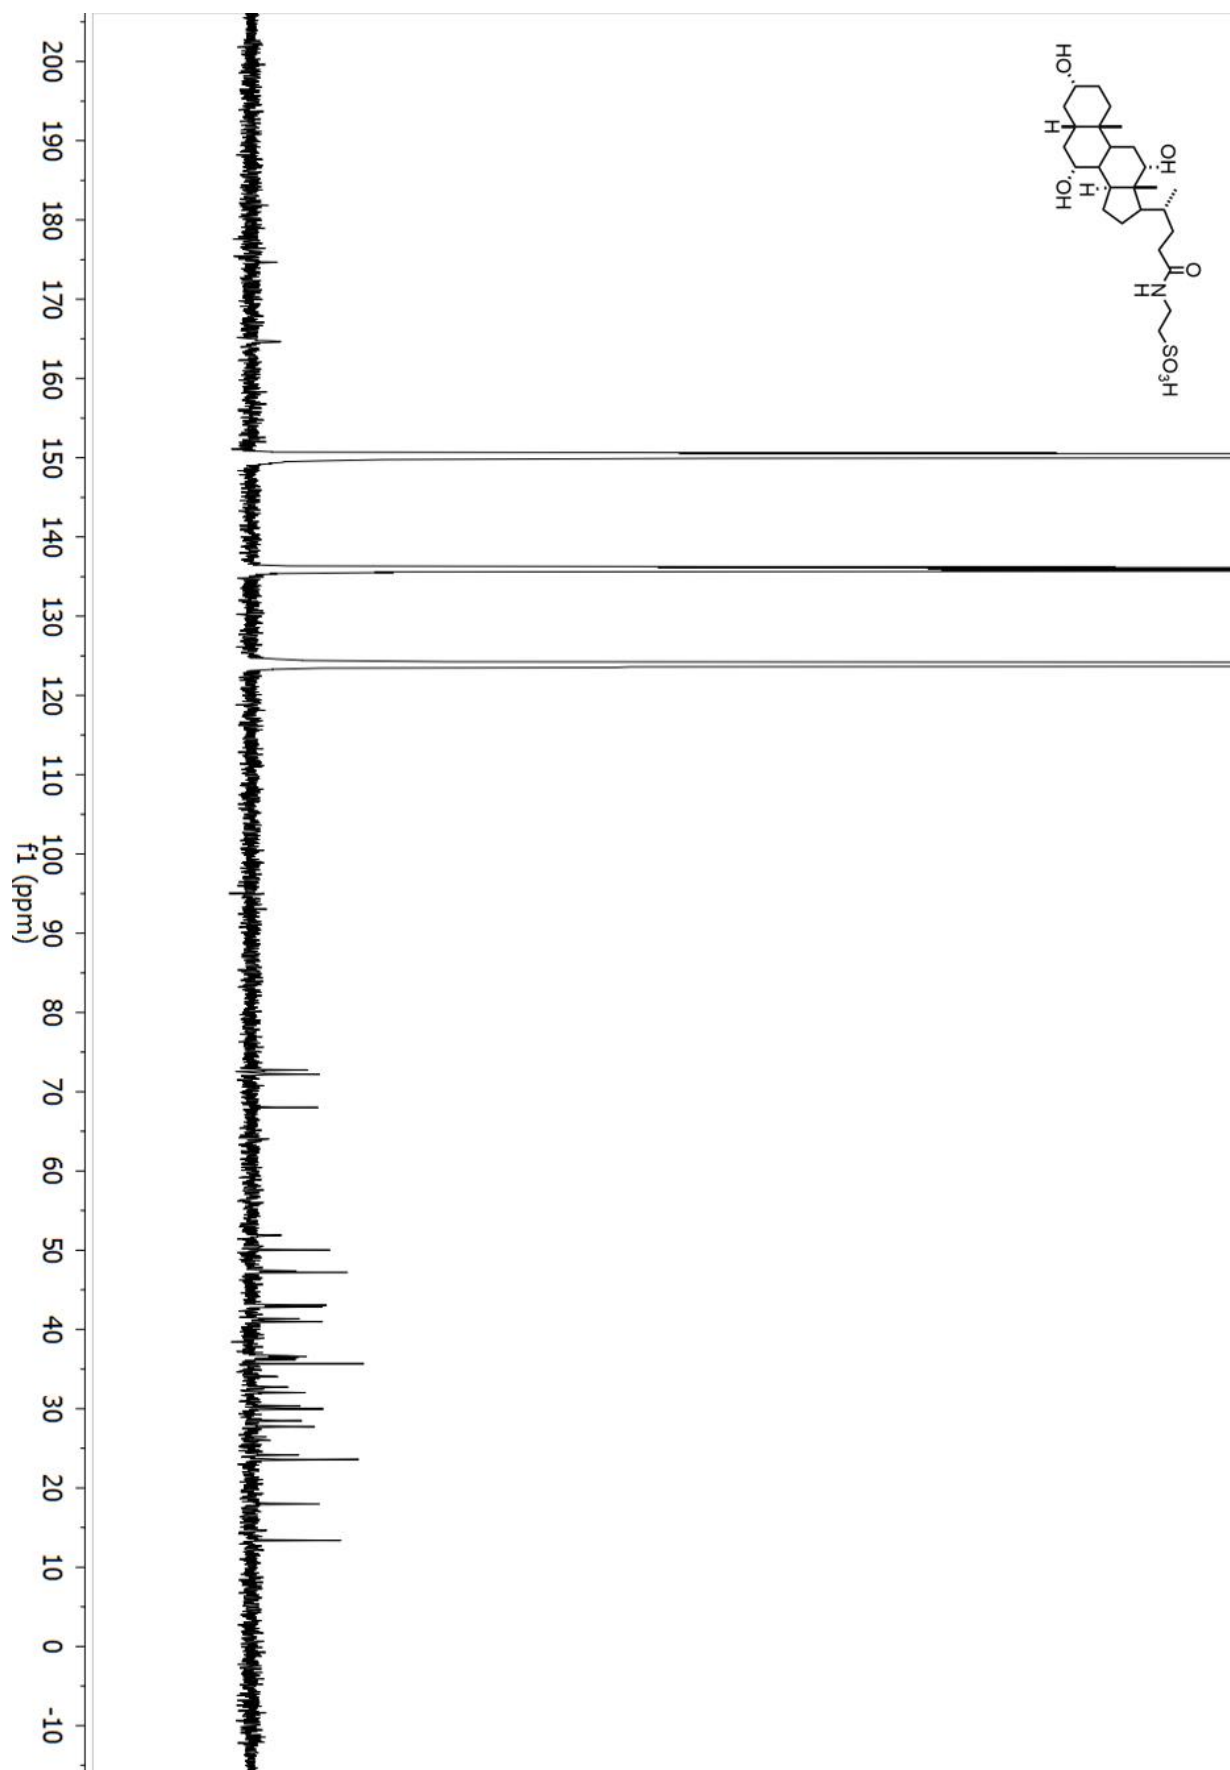



# <sup>13</sup>C NMR spectra of commercially purchased TCA (1)

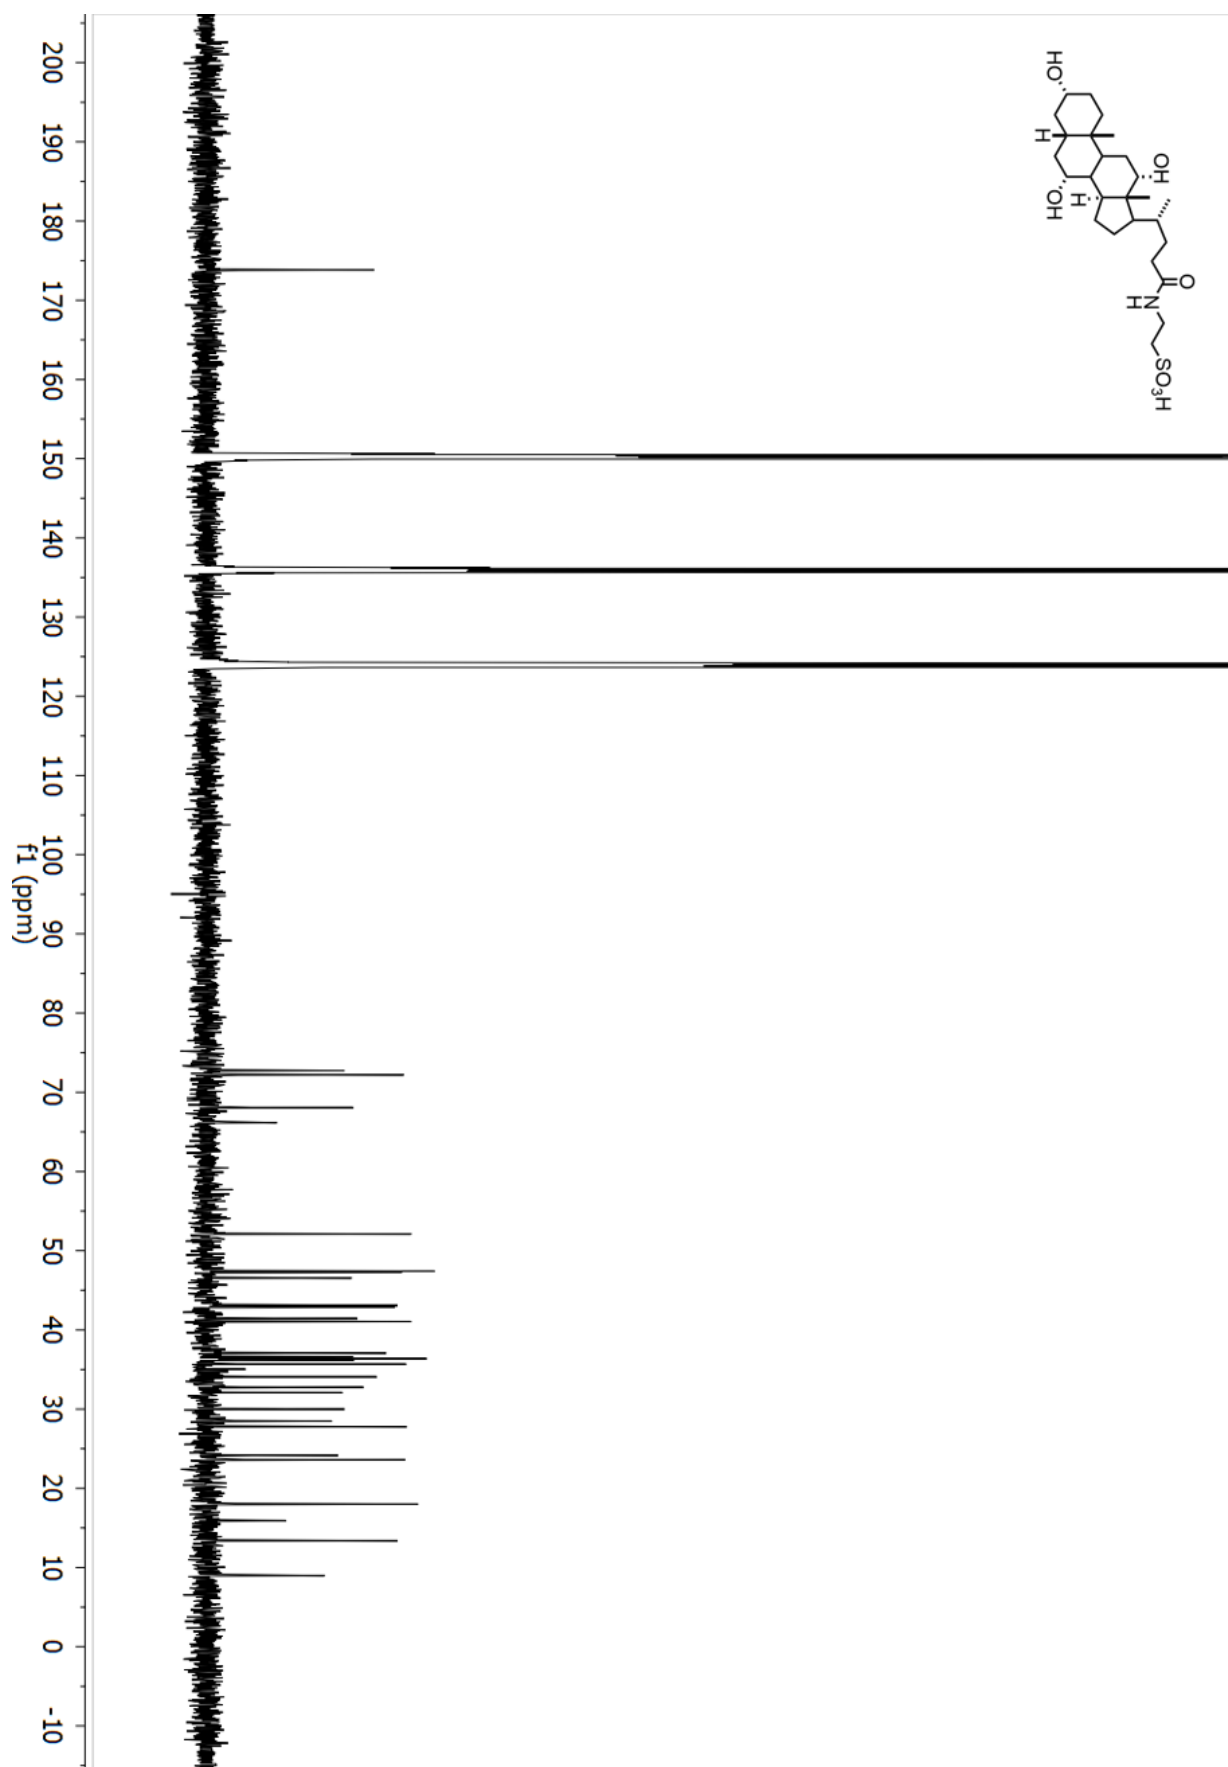

Supplement: pone.0149603.s001.pdf [file pone.0149603.s001.pdf]
