# Supplementary material for: Biofilm Formation and Detachment in Gram-Negative Pathogens Is Modulated by Select Bile Acids
Source: PubMed Central journal article supplement (PMC4798295; doi:10.1371/journal.pone.0149603), 2016-03-18

**EIC of TCA (1) of commercially purchased sample of TCA (1) and that isolated from extract *R. erythropolis* FI1021DH2S2**

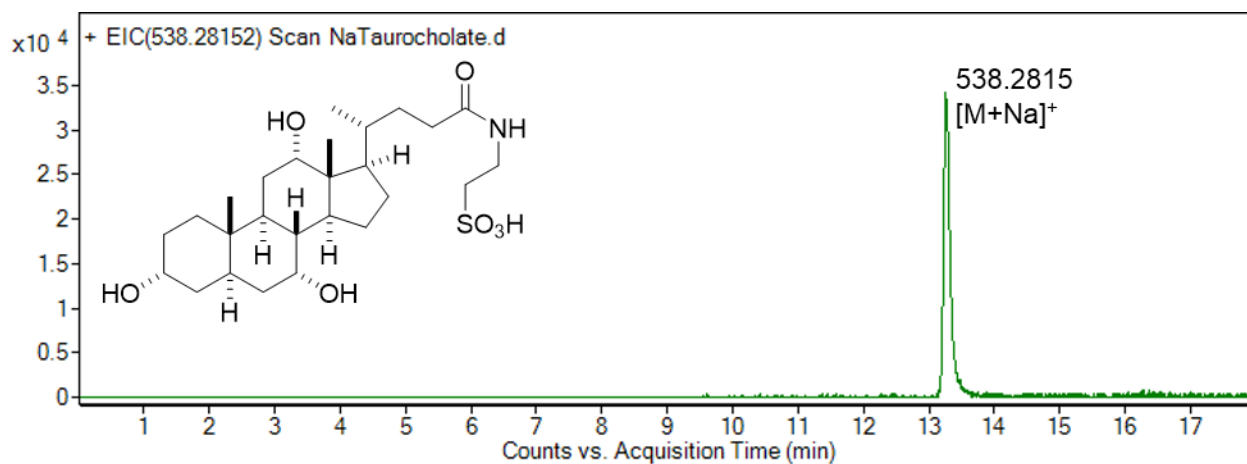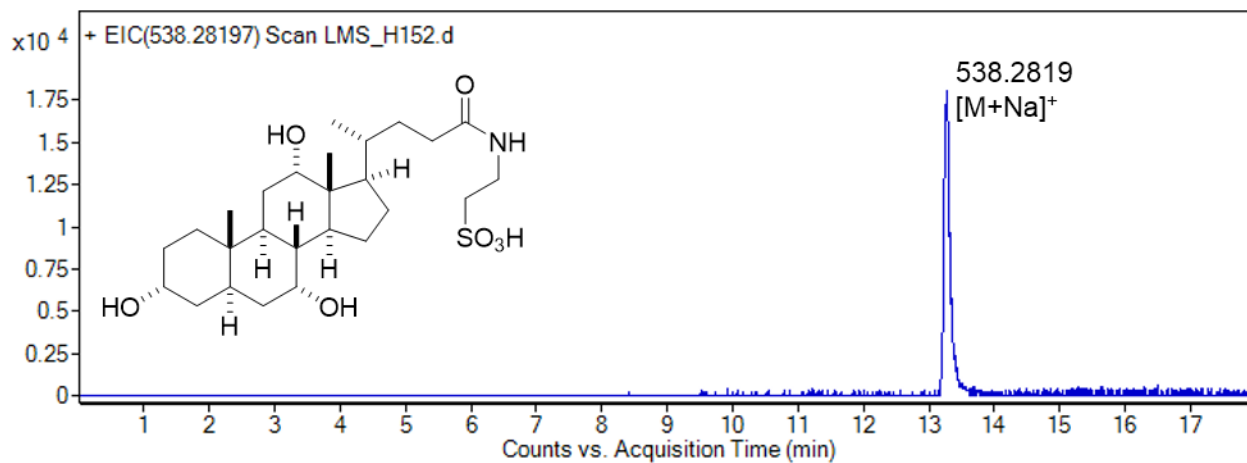

Supplement: pone.0149603.s002.pdf [file pone.0149603.s002.pdf]
