# Supplementary material for: Biofilm Formation and Detachment in Gram-Negative Pathogens Is Modulated by Select Bile Acids
Source: PubMed Central journal article supplement (PMC4798295; doi:10.1371/journal.pone.0149603), 2016-03-18

**Figure S3.** BIC<sub>50</sub> curves for the active compounds against *V. cholerae*

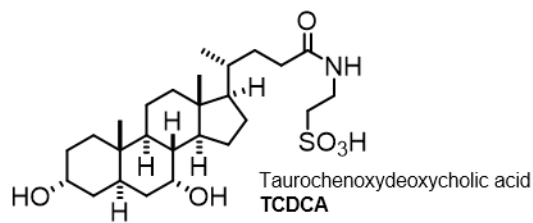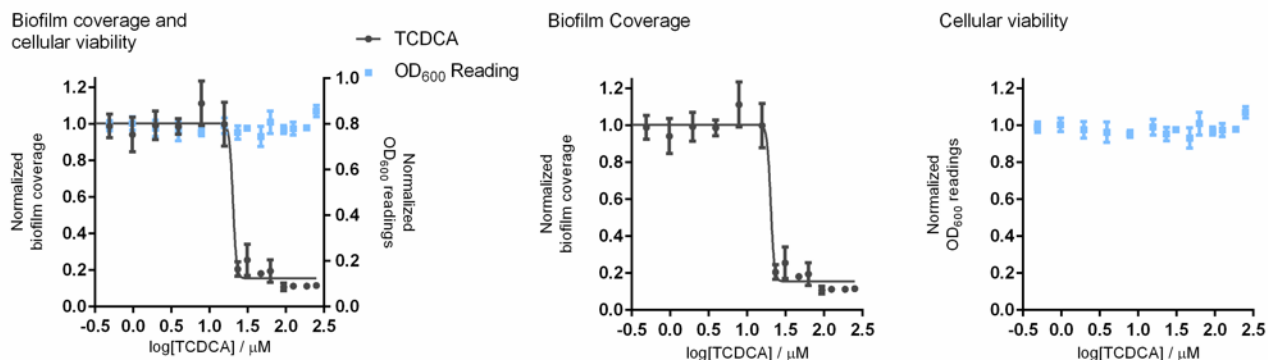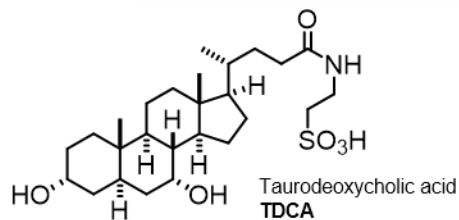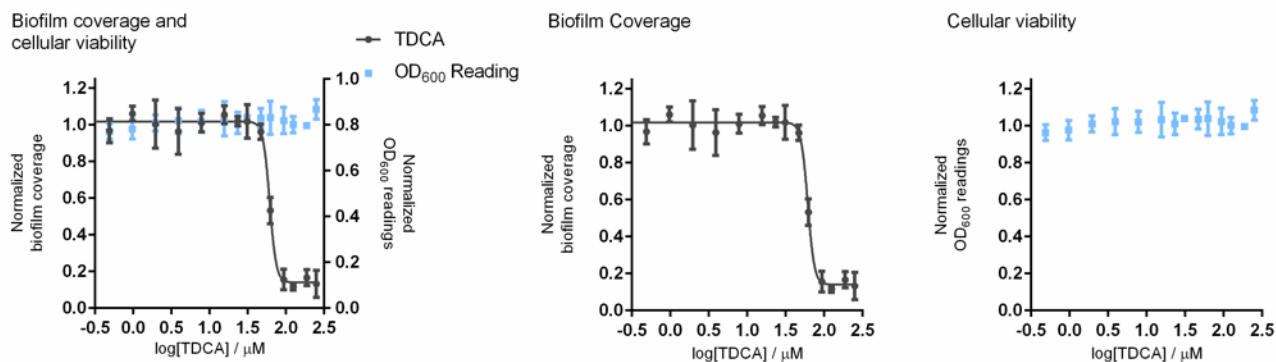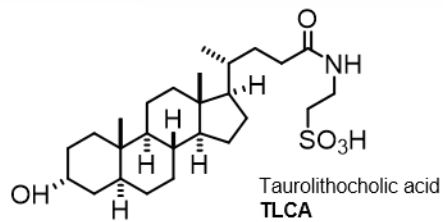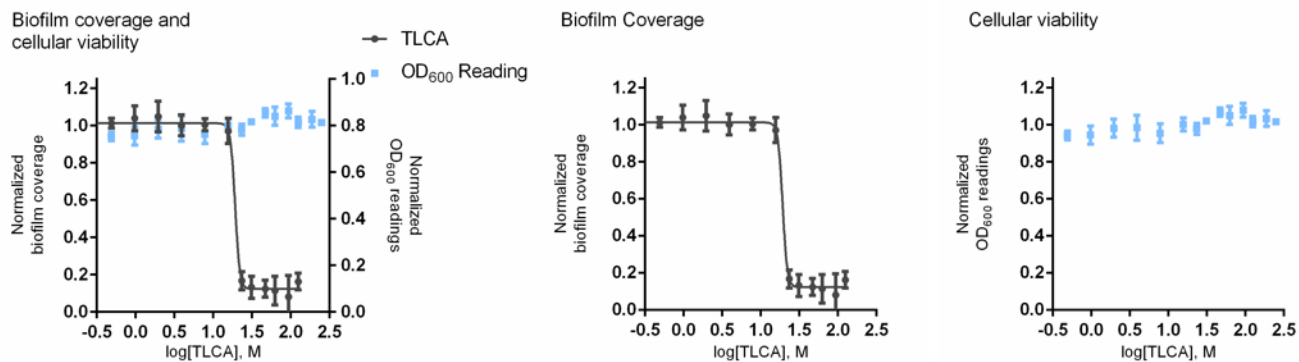

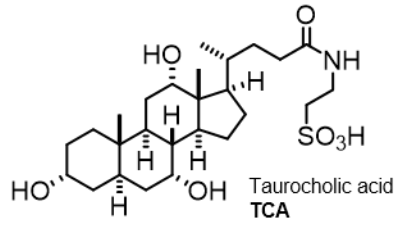

Biofilm coverage and cellular viability

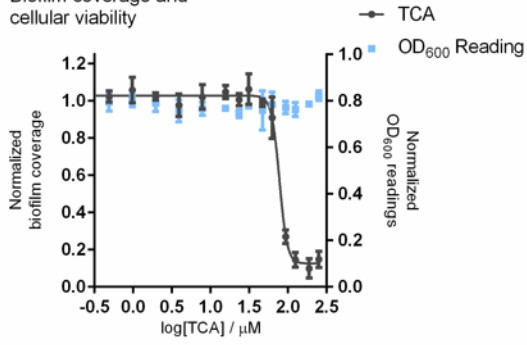

Biofilm Coverage

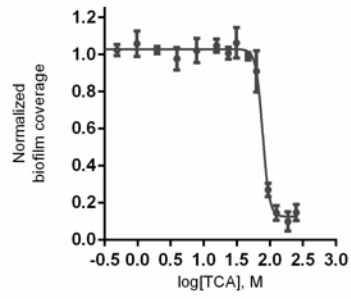

Cellular viability

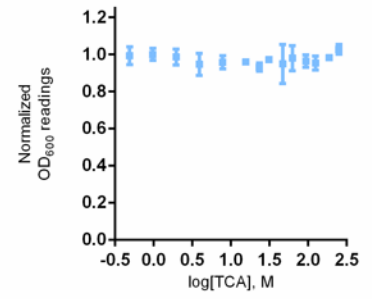

Supplement: pone.0149603.s003.pdf [file pone.0149603.s003.pdf]
