# Supplementary material for: Biofilm Formation and Detachment in Gram-Negative Pathogens Is Modulated by Select Bile Acids
Source: PubMed Central journal article supplement (PMC4798295; doi:10.1371/journal.pone.0149603), 2016-03-18
Supplement: pone.0149603.s007.pdf [file pone.0149603.s007.pdf]

**Table S2.** COMSTAT Analysis for *V. cholerae* preformed biofilm formation.

| Time (h) | Condition   | Total biomass<br>( $\mu\text{m}^3/\mu\text{m}^2$ ) | Thickness ( $\mu\text{m}$ ) |             |
|----------|-------------|----------------------------------------------------|-----------------------------|-------------|
|          |             |                                                    | Average                     | Maximum     |
| 5        | No compound | 23.21 (3.0)                                        | 28.54 (3.6)                 | 44.88 (4.0) |
|          | DMSO        | 20.89 (3.1)                                        | 26.14 (5.0)                 | 41.65 (3.5) |
| 7        | No compound | 24.33 (1.2)                                        | 21.96 (5.5)                 | 45.50 (5.9) |
|          | DMSO        | 23.96 (2.2)                                        | 21.04 (3.2)                 | 43.88 (2.6) |
|          | Bile        | 19.13 (0.9)                                        | 19.48 (1.1)                 | 33.73 (8.8) |
|          | TCA (1)     | 11.88 (0.4)                                        | 12.91 (0.4)                 | 29.92 (3.8) |
|          | TCDCA (2)   | 8.70 (2.2)                                         | 6.80 (3.7)                  | 29.62 (8.2) |
| 24       | No compound | 20.02 (3.0)                                        | 21.96 (5.5)                 | 47.23 (3.1) |
|          | DMSO        | 19.96 (2.2)                                        | 21.04 (3.2)                 | 42.88 (4.6) |
|          | Bile        | 16.00 (2.4)                                        | 19.76 (3.0)                 | 40.48 (9.5) |
|          | TCA (1)     | 4.99 (0.3)                                         | 7.63 (0.5)                  | 39.30 (7.6) |
|          | TCDCA (2)   | 0.89 (0.4)                                         | 1.21(1.1)                   | 3.96 (5.7)  |
