# Supplementary material for: Biofilm Formation and Detachment in Gram-Negative Pathogens Is Modulated by Select Bile Acids
Source: PubMed Central journal article supplement (PMC4798295; doi:10.1371/journal.pone.0149603), 2016-03-18
Supplement: pone.0149603.s008.pdf [file pone.0149603.s008.pdf]

**Table S3.** COMSTAT Analysis for bile acid components that reduce biofilm formation in *P. aeruginosa*.

| COMSTAT analysis of biofilm formation |          |                                                    |                             |              |
|---------------------------------------|----------|----------------------------------------------------|-----------------------------|--------------|
| Condition                             | Time (h) | Total biomass<br>( $\mu\text{m}^3/\mu\text{m}^2$ ) | Thickness ( $\mu\text{m}$ ) |              |
|                                       |          |                                                    | Average                     | Maximum      |
| DMSO                                  | 24       | 11.00 (1.8)                                        | 19.05 (2.0)                 | 51.50 (5.0)  |
| TLCA (4)                              | 24       | 7.01 (1.4)                                         | 13.5 (2.0)                  | 85.00 (17.8) |

| COMSTAT analysis of preformed biofilm formation |          |                                                    |                             |             |
|-------------------------------------------------|----------|----------------------------------------------------|-----------------------------|-------------|
| Condition                                       | Time (h) | Total biomass<br>( $\mu\text{m}^3/\mu\text{m}^2$ ) | Thickness ( $\mu\text{m}$ ) |             |
|                                                 |          |                                                    | Average                     | Maximum     |
| DMSO                                            | 24       | 23.00 (3.0)                                        | 33.65 (4.9)                 | 71.85 (2.5) |
| TLCA (4)                                        | 24       | 20.10 (1.4)                                        | 18.15 (0.3)                 | 30.80 (0.0) |
