# Supplementary material for: Biofilm Formation and Detachment in Gram-Negative Pathogens Is Modulated by Select Bile Acids
Source: PubMed Central journal article supplement (PMC4798295; doi:10.1371/journal.pone.0149603), 2016-03-18
Supplement: pone.0149603.s009.pdf [file pone.0149603.s009.pdf]

**Table S4.** Fatty acids and other major constituents of bile screened in our high content *V. cholerae* assay.

| <b>Compound</b>      | <b>Reported MIC</b>                   | <b>Highest Conc Tested</b> |
|----------------------|---------------------------------------|----------------------------|
| palmitic acid        | 15 mM <sup>a</sup> , 5mM <sup>b</sup> | 1 mM                       |
| cis-palmitoleic acid | NA <sup>c</sup>                       | 1 mM                       |
| stearic acid         | 14 mM <sup>a</sup>                    | 250 μM                     |
| arachidonic acid     | 2.5 mM <sup>a</sup>                   | 1 mM                       |
| linoleic acid        | 3.5 mM <sup>a</sup>                   | 1 mM                       |
| oleic acid           | 2.7 mM <sup>a</sup>                   | 1 mM                       |
| bilirubin            | nt                                    | 250 μM                     |
| phosphatidylcholine  | nt                                    | 250 μM                     |

nt = not previously tested other studies.

a see reference 1.

b see reference 2.

c, see reference 3. Crystal structure obtained, no MIC reported.

## References

1. Chatterjee, A.; Dutta, P. K.; Chowdhury, R. *Infect Immun* **2007**, *75* (4), 1946-1953.
2. Lowden, M. J.; Skorupski, K.; Pellegrini, M.; Chiorazzo, M. G.; Taylor, R. K.; Kull, F. J. *Proc Natl Acad Sci U.S.A.* **2010**, *107* (7), 2860-2865.
3. Ray, S.; Chatterjee, E.; Chatterjee, A.; Paul, K.; Chowdhury, R. *Infect Immun* **2011**, *79* (1), 258-266.
